# Supplementary material for: Large oncosomes overexpressing integrin alpha-V promote prostate cancer adhesion and invasion via AKT activation
Source: PubMed Central journal article supplement (PMC6639931; doi:10.1186/s13046-019-1317-6), 2019-07-18
Supplement: 13046_2019_1317_MOESM2_ESM.pdf [file 13046_2019_1317_MOESM2_ESM.pdf]

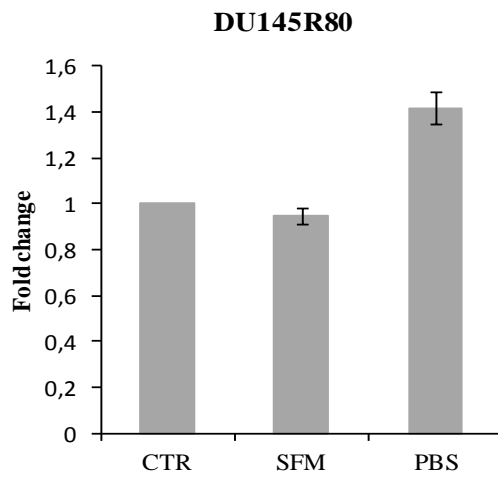

**Supplementary Figure S1. Serum free culturing conditions do not induce apoptosis in DU145R80.**
