# Supplementary material for: Large oncosomes overexpressing integrin alpha-V promote prostate cancer adhesion and invasion via AKT activation
Source: Springer Nature journal article supplement (doi:10.1186/s13046-019-1317-6), 2019-07-18
Supplement: MOESM4 [file 13046_2019_1317_MOESM4_ESM.pdf]

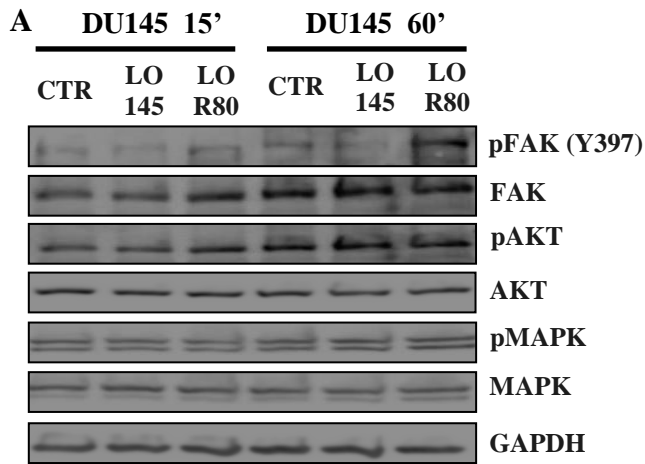

**B**

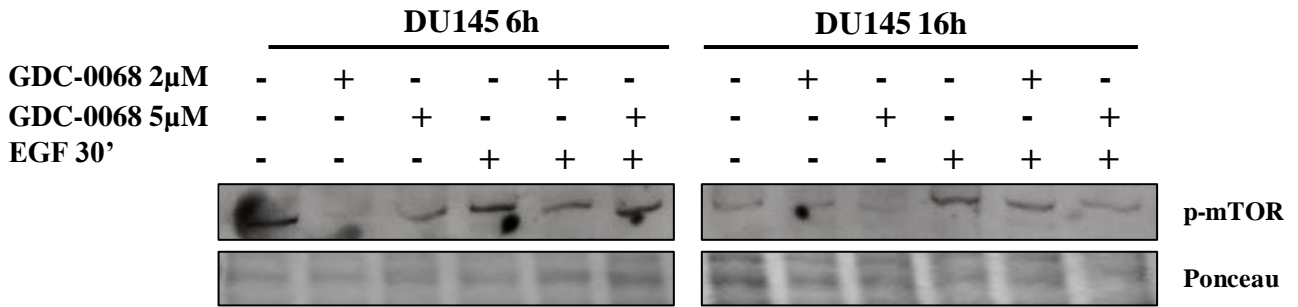

**C**

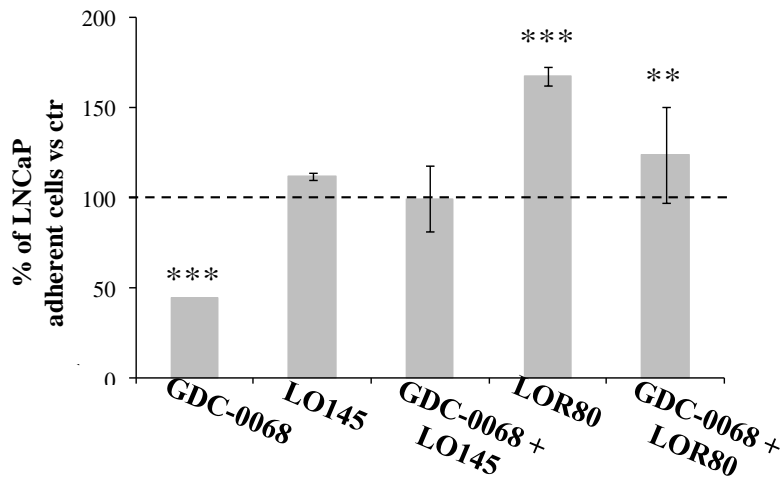

**Supplementary Figure S3. AKT activation upon LOR80 exposure is essential to LO-induced recipient cell adhesion.**
